# Supplementary material
Source: publisher figshare collection journal article supplement (https://aacr.figshare.com/articles/dataset/_/22469909)

# Figure S3

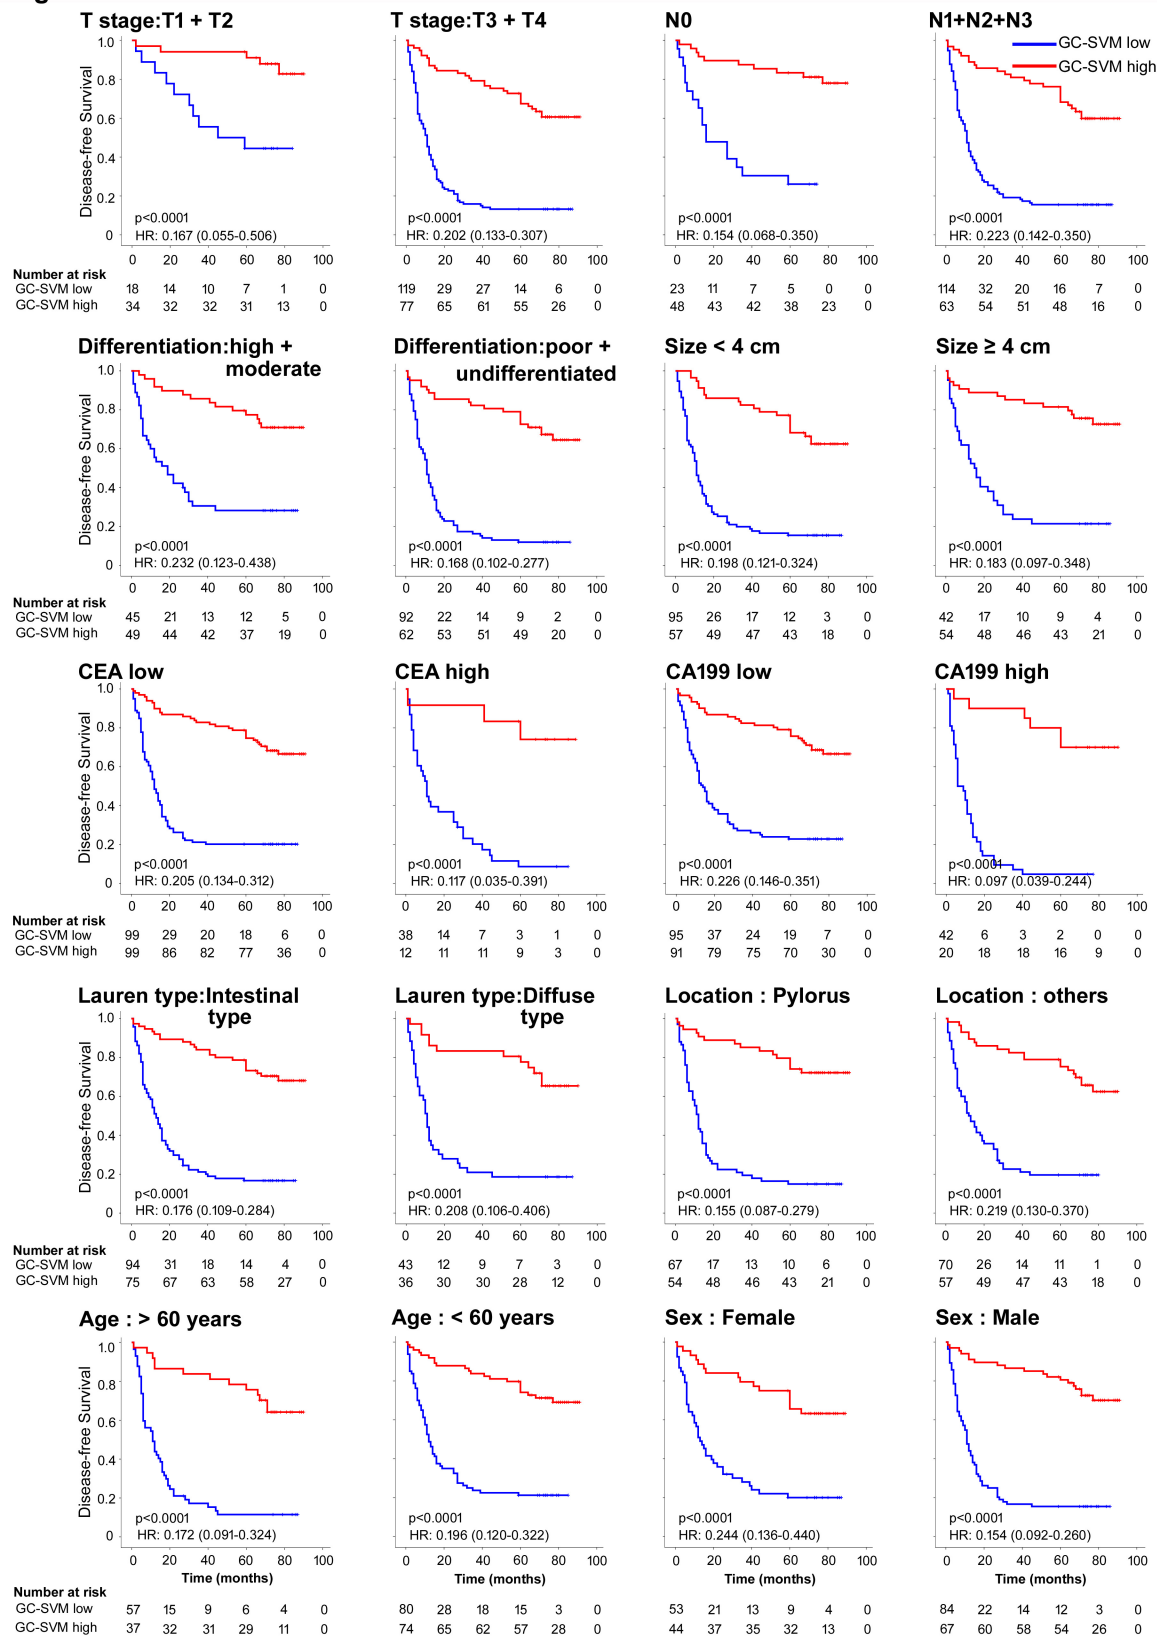

Supplement: Supplementary file 1 [file 39921395]
